# Supplementary material
Source: MDPI journal article supplement (https://www.mdpi.com/2073-4395/13/12/2872)
Supplement: s1 [file s1]

## Supplementary Materials:

**Table S1.** Total water supplied under continuous flooded and drip irrigation with plastic-film mulch systems during the growth season of 2020 and 2021.

| Year | Irrigation regime | Irrigation (mm) | Precipitation (mm) | Total water supplied (mm) |
|------|-------------------|-----------------|--------------------|---------------------------|
| 2020 | CF                | 1085            | 822                | 1907                      |
|      | DI                | 389             | 822                | 1209                      |
| 2021 | CF                | 985             | 1022               | 2007                      |
|      | DI                | 311             | 1022               | 1334                      |

Total water supplied = Irrigation water + Precipitation; CF and DI indicate continuous flooded system and drip irrigation with plastic-film mulch systems, respectively.

**Table S2.** Shoot dry matter, root dry matter and root-to-shoot ratio of four rice varieties under continuous flooded (CF) and drip irrigation with plastic-film mulch systems (DI) in 2020 and 2021.

| Cultivar              | Panicle-initiation stage             |        |                                     |        |               |         | Heading stage                        |          |                                     |        |               |        |
|-----------------------|--------------------------------------|--------|-------------------------------------|--------|---------------|---------|--------------------------------------|----------|-------------------------------------|--------|---------------|--------|
|                       | Shoot dry matter(g m <sup>-2</sup> ) |        | Root dry matter(g m <sup>-2</sup> ) |        | Root-to-shoot |         | Shoot dry matter(g m <sup>-2</sup> ) |          | Root dry matter(g m <sup>-2</sup> ) |        | Root-to-shoot |        |
|                       | CF                                   | DI     | CF                                  | DI     | CF            | DI      | CF                                   | DI       | CF                                  | DI     | CF            | DI     |
| <b>2020</b>           |                                      |        |                                     |        |               |         |                                      |          |                                     |        |               |        |
| Norin                 | 206.6a                               | 235.3a | 54.2b                               | 56.0a  | 0.263b        | 0.240c  | 1296.6b                              | 1415.6a  | 289.3a                              | 252.2a | 0.223a        | 0.178a |
| Mitsu                 | 212.7a                               | 188.0b | 65.0a                               | 55.1a  | 0.306ab       | 0.293b  | 1330.9b                              | 1241.2b  | 227.4b                              | 198.6b | 0.171bc       | 0.160b |
| Hoku                  | 145.9b                               | 143.9c | 53.9b                               | 57.9a  | 0.372a        | 0.402a  | 1448.4a                              | 1220.4b  | 227.1b                              | 179.9c | 0.157c        | 0.148b |
| Koshi                 | 147.1b                               | 148.5c | 50.5b                               | 41.3b  | 0.345a        | 0.280bc | 1159.6c                              | 1028.2c  | 203.4c                              | 163.1c | 0.176b        | 0.159b |
| Mean                  | 178.1                                | 178.9  | 55.9                                | 52.6   | 0.322         | 0.304   | 1308.9                               | 1226.4   | 236.8                               | 198.5  | 0.182         | 0.161  |
| <b>2021</b>           |                                      |        |                                     |        |               |         |                                      |          |                                     |        |               |        |
| Norin                 | 210.9a                               | 226.7a | 54.6                                | 53.4a  | 0.260b        | 0.236bc | 1303.8                               | 1468.2a  | 282.7a                              | 249.5a | 0.220a        | 0.170  |
| Mitsu                 | 213.1a                               | 176.6b | 68.6                                | 50.0ab | 0.32ab        | 0.283b  | 1306.0                               | 1211.8b  | 224.8b                              | 190.4b | 0.172ab       | 0.157  |
| Hoku                  | 144.7b                               | 139.0b | 54.4                                | 56.7a  | 0.376a        | 0.410a  | 1468.3                               | 1249.1ab | 207.6b                              | 178.1b | 0.141b        | 0.145  |
| Koshi                 | 148.4b                               | 164.8b | 51.3                                | 37.7b  | 0.354a        | 0.229c  | 1245.4                               | 965.0c   | 218.2b                              | 156.8b | 0.184ab       | 0.163  |
| Mean                  | 179.3                                | 176.8  | 57.2                                | 49.5   | 0.328         | 0.290   | 1330.9                               | 1223.5   | 233.3                               | 193.7  | 0.179         | 0.159  |
| Year(Y)               | ns                                   |        | ns                                  |        | ns            |         | ns                                   |          | ns                                  |        | ns            |        |
| Cultivar(C)           | ***                                  |        | ***                                 |        | ***           |         | **                                   |          | ***                                 |        | ***           |        |
| Irrigation system(IR) | ns                                   |        | ns                                  |        | *             |         | *                                    |          | *                                   |        | *             |        |
| Y × C                 | ns                                   |        | ns                                  |        | ns            |         | ns                                   |          | ns                                  |        | ns            |        |
| Y × IR                | ns                                   |        | ns                                  |        | ns            |         | ns                                   |          | ns                                  |        | ns            |        |
| IR × C                | *                                    |        | **                                  |        | **            |         | *                                    |          | ns                                  |        | ns            |        |
| Y × IR × C            | ns                                   |        | ns                                  |        | ns            |         | ns                                   |          | ns                                  |        | ns            |        |

Noted: Data indicate the mean of three replications. \*, \*\* and \*\*\* are significant differences at  $p < 0.05$ ,  $p < 0.01$  and  $p < 0.001$  respectively; ns means non-significant by ANOVA.
